# Supplementary material for: Cortical neurons and networks are dormant but fully responsive during isoelectric brain state
Source: Oxford University Press journal article supplement (doi:10.1093/brain/awx175), 2017-06-22
Supplement: awx175_supplementary_brain-2016-02340-file011.pdf [file awx175_supplementary_brain-2016-02340-file011.pdf]

**Supplementary Table 1 Physiological parameters of rats in control and isoelectric conditions**

|                       | <b>Control (Fent + Pento)</b><br>(n = 10 rats) | <b>Iso</b><br>(n = 5 rats) |      |
|-----------------------|------------------------------------------------|----------------------------|------|
| Heart rate (b.p.m)    | 423.5 ± 8.7                                    | 339.6 ± 5.2                | ***  |
| SpO <sub>2</sub> (%)  | 91.1 ± 1.7                                     | 91.2 ± 3.0                 | n.s. |
| EtCO <sub>2</sub> (%) | 4.4 ± 0.2                                      | 4.3 ± 0.3                  | n.s. |
| Respi. rate (c.p.m)   | 89.9 ± 3.4                                     | 93.8 ± 5.8                 | n.s. |
| Temp. (°C)            | 36.9 ± 0.05                                    | 36.9 ± 0.06                | n.s. |

Statistical comparisons were made between pooled control values (Fent + Pento) and isoelectric condition (Iso). \*\*\* $P < 0.001$ ; n.s., non-significant.

**Supplementary Table 2 Neuronal parameters in control and isoelectric conditions**

| <i>Neocortex</i>          | <b>Control</b> | <i>n</i> | <b>Iso</b>  | <i>n</i> |      |
|---------------------------|----------------|----------|-------------|----------|------|
| <i>V<sub>m</sub></i> (mV) | -66.1 ± 1.1    | 22       | -70.4 ± 1.1 | 22       | **   |
| <i>R<sub>m</sub></i> (MΩ) | 21 ± 1.8       | 19       | 20.4 ± 2.1  | 19       | n.s. |
| <i>τ<sub>m</sub></i> (ms) | 6.7 ± 0.4      | 19       | 6.5 ± 0.4   | 19       | n.s. |
| AP amplitude (mV)         | 65.8 ± 1.2     | 22       | 65.9 ± 1.4  | 14       | n.s. |
| AP duration (ms)          | 1.2 ± 0.05     | 22       | 1.2 ± 0.06  | 14       | n.s. |
| Evoked AP threshold (mV)  | -53.6 ± 1.2    | 13       | -54.1 ± 0.9 | 5        | n.s. |
| I <sub>th</sub> (nA)      | 0.09 ± 0.06    | 12       | 0.64 ± 0.12 | 12       | ***  |

  

| <i>Thalamus</i>           | <b>Control</b> | <i>n</i> | <b>Iso</b>  | <i>n</i> |      |
|---------------------------|----------------|----------|-------------|----------|------|
| <i>V<sub>m</sub></i> (mV) | -62.6 ± 2.2    | 7        | -69.7 ± 1.9 | 7        | *    |
| <i>R<sub>m</sub></i> (MΩ) | 21.4 ± 2.2     | 7        | 20.1 ± 4.2  | 7        | n.s. |
| <i>τ<sub>m</sub></i> (ms) | 10.6 ± 1.7     | 7        | 7.4 ± 1.0   | 7        | n.s. |
| AP amplitude (mV)         | 50.5 ± 1.6     | 7        | 49.7 ± 2.3  | 3        | n.s. |
| AP duration (ms)          | 1.2 ± 0.07     | 7        | 1.3 ± 0.04  | 3        | n.s. |
| I <sub>th</sub> (nA)      | 0.18 ± 0.06    | 4        | 1.3 ± 0.3   | 5        | *    |

  

| <i>Hippocampus</i>        | <b>Control</b> | <i>n</i> | <b>Iso</b>  | <i>n</i> |      |
|---------------------------|----------------|----------|-------------|----------|------|
| <i>V<sub>m</sub></i> (mV) | -64.4 ± 2.4    | 3        | -73.5 ± 2.2 | 4        | *    |
| <i>R<sub>m</sub></i> (MΩ) | 29.7 ± 5.7     | 3        | 33.2 ± 6.8  | 4        | n.s. |
| <i>τ<sub>m</sub></i> (ms) | 12.9 ± 2.7     | 3        | 10.8 ± 0.9  | 4        | n.s. |
| AP amplitude (mV)         | 76.2 ± 2.5     | 3        | 79.4 ± 2.5  | 4        | n.s. |
| AP duration (ms)          | 1.2 ± 0.1      | 3        | 1.2 ± 0.05  | 4        | n.s. |
| I <sub>th</sub> (nA)      | 0.04 ± 0.04    | 3        | 0.20 ± 0.07 | 4        | *    |

Statistical comparisons were made between pooled control values (Fent + Pento) and isoelectric condition (Iso). *V<sub>m</sub>*, membrane potential; *R<sub>m</sub>*, membrane resistance; *τ<sub>m</sub>*, membrane time constant; AP, action potential; I<sub>th</sub>, minimal current intensity to fire the cell. \**P* < 0.05; \*\**P* < 0.01; \*\*\**P* < 0.001; n.s., non-significant.
